# Supplementary material for: mTOR activates the VPS34–UVRAG complex to regulate autolysosomal tubulation and cell survival
Source: PubMed Central journal article supplement (PMC4585463; doi:10.15252/embj.201590992), 2015-07-02

Figure 3 - Source Data

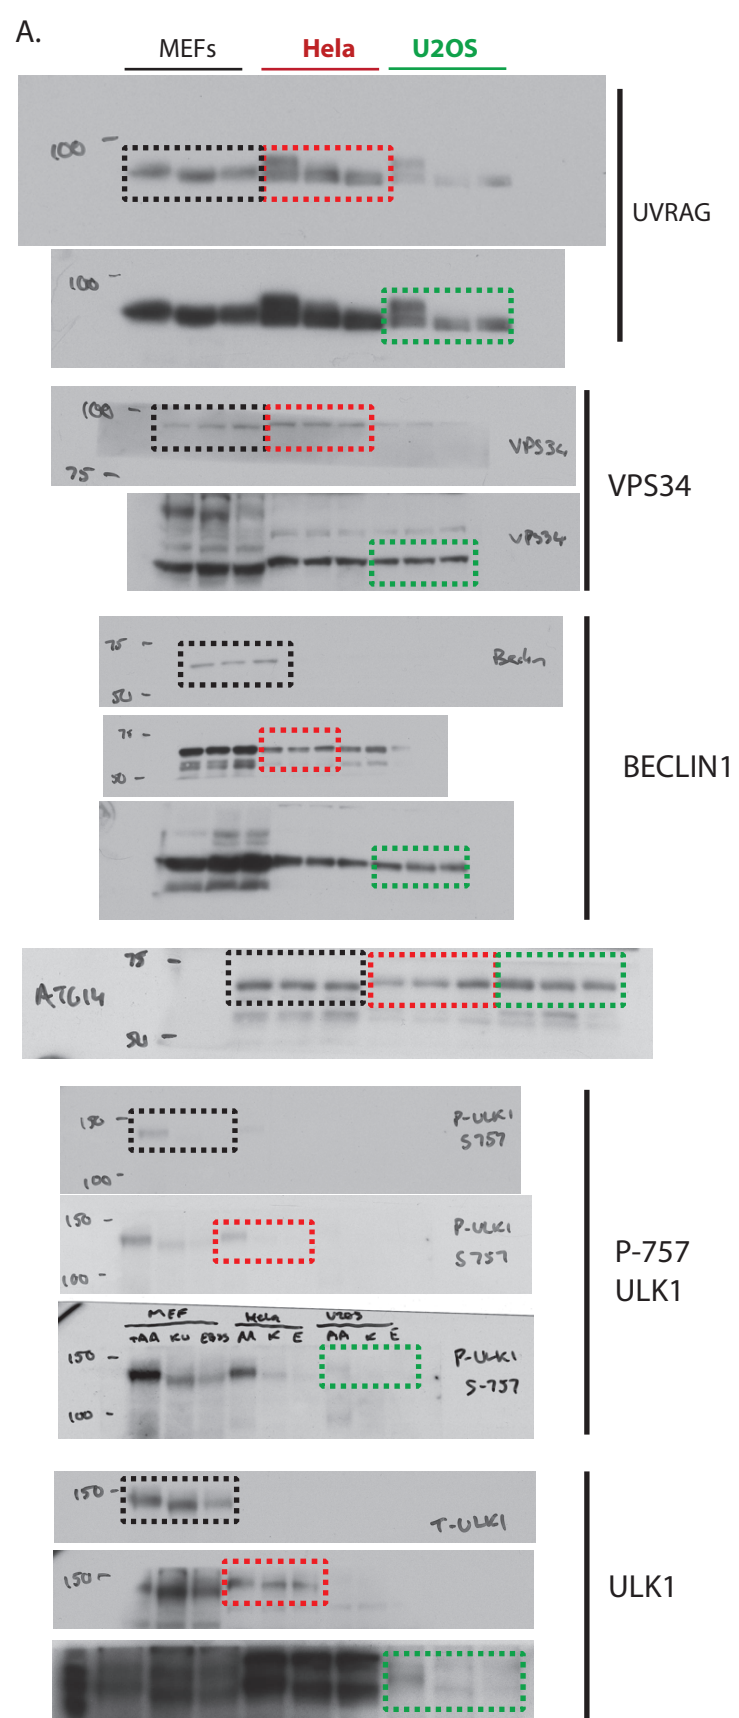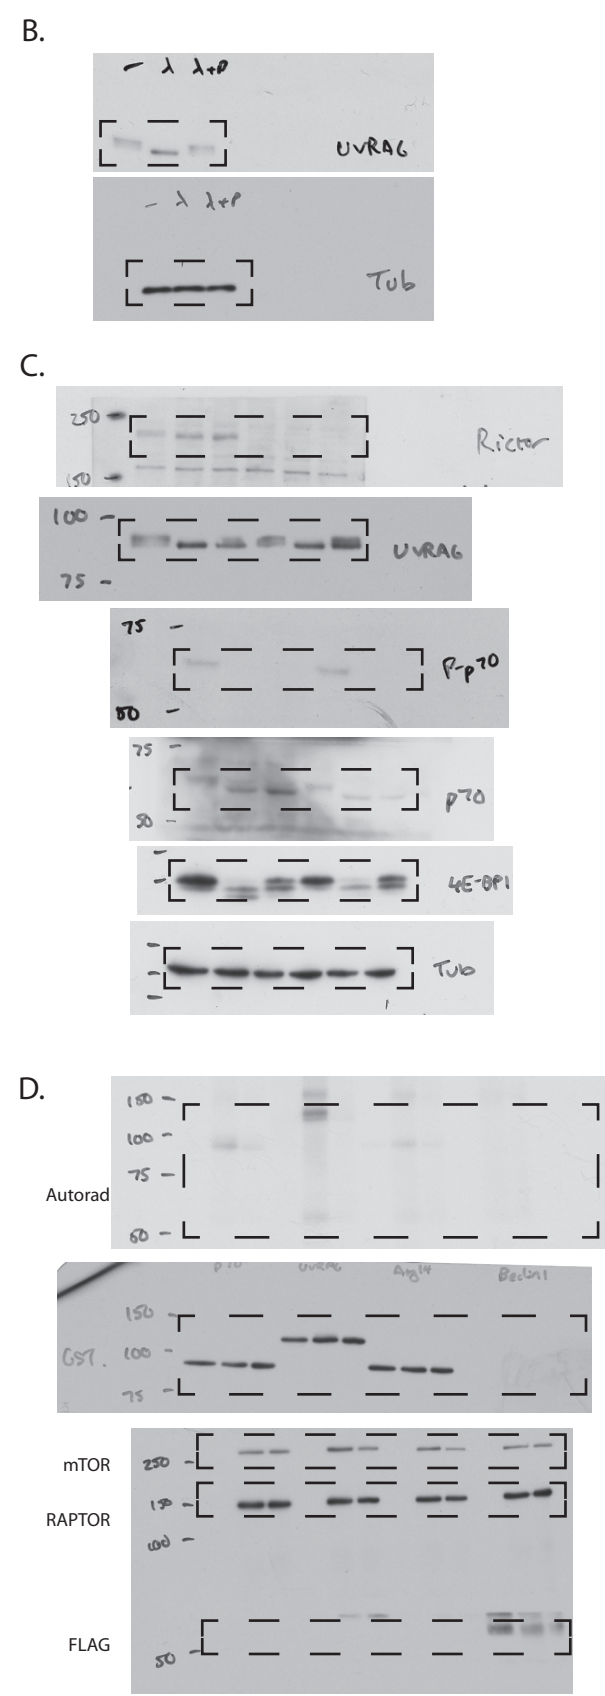

Supplement: embj0034-2272-sd14.pdf [file embj0034-2272-sd14.pdf]
