# Supplementary material for: mTOR activates the VPS34–UVRAG complex to regulate autolysosomal tubulation and cell survival
Source: PubMed Central journal article supplement (PMC4585463; doi:10.15252/embj.201590992), 2015-07-02

Figure 8 - Source Data

A.

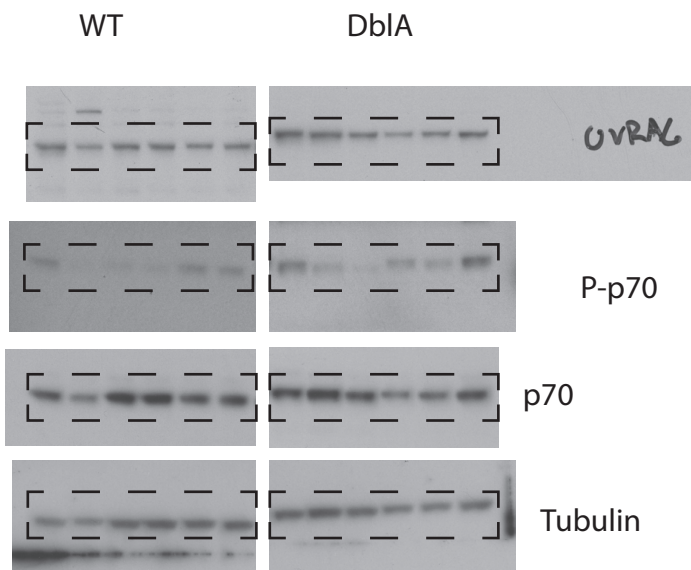

Supplement: embj0034-2272-sd19.pdf [file embj0034-2272-sd19.pdf]
